# Supplementary material
Source: HighWire-hosted journal article supplement (https://ajnr-sso.highwirestaging.com/highwire/filestream/108970/field_highwire_adjunct_files/0/1109.pdf)
Supplement: 1109.pdf [file 1109.pdf]

**Middle cerebral artery-parallel anatomical scanning Magnetic Resonance  
Imaging (MCPAS) guided recanalization of chronic occluded Middle Cerebral  
Artery by endovascular treatment**

**Running title:** MCPSA guided recanalization of occluded MCA

Cheng-Chun Liu<sup>1,2#</sup>, Yi Yang<sup>1,2#</sup>, Jun Dong<sup>1,2</sup>, Zhi-Qiang Sun<sup>1,2</sup>, Qi-Sheng Ran<sup>3</sup>, Wei  
Li<sup>1,2</sup>, Wang-Sheng Jin<sup>1,2\*</sup>, Meng Zhang<sup>1,2</sup>

<sup>1</sup>Department of Neurology and Centre for Clinical Neuroscience, Daping Hospital,  
Third Military Medical University, Chongqing, China.

<sup>2</sup>Chongqing Key Laboratory of Ageing and Brain Diseases, Chongqing, China.

<sup>3</sup>Department of Medical Iconography, Daping Hospital, Third Military Medical  
University, Chongqing, China.

# These authors contributed equally to this work.

\* Correspondence: Wang-Sheng Jin at skjws123@163.com.

Table 1 Characteristics of the patients

| Patients  | Age | Target artery | Rapid Tmax > 6s | Treatment strategy | Reocclusion (1 year) | NIHSS admission | NIHSS discharged | mRS 6 mon | complication |
|-----------|-----|---------------|-----------------|--------------------|----------------------|-----------------|------------------|-----------|--------------|
| Patient 1 | 60s | RM1           | 72ml            | 1 + 2              | No                   | 5               | 5                | 1         | No           |
| Patient 2 | 50s | LM1           | -               | 1                  | No                   | 0               | 0                | 0         | No           |
| Patient 3 | 70s | RM1           | 16ml            | 1 +2               | No                   | 0               | 0                | 0         | No           |
| Patient 4 | 30s | LM1           | 251ml           | 1                  | No                   | 0               | 0                | 0         | No           |
| Patient 5 | 70s | BM1           | -               | 1 + 2              | No                   | 0               | 0                | 0         | No           |

RM1 segment of right middle cerebral artery; LM1, M1 segment of left middle cerebral artery; BM1, M1 segment of bilateral middle cerebral artery; Rapid Tmax > 6s, The volume calculated by Rapid software yields Tmax > 6s; Treatment strategy, 1 balloon dilatation, 2 stent implantation; Reocclusion (1 year), 1-year follow-up revealed reocclusion of the artery.

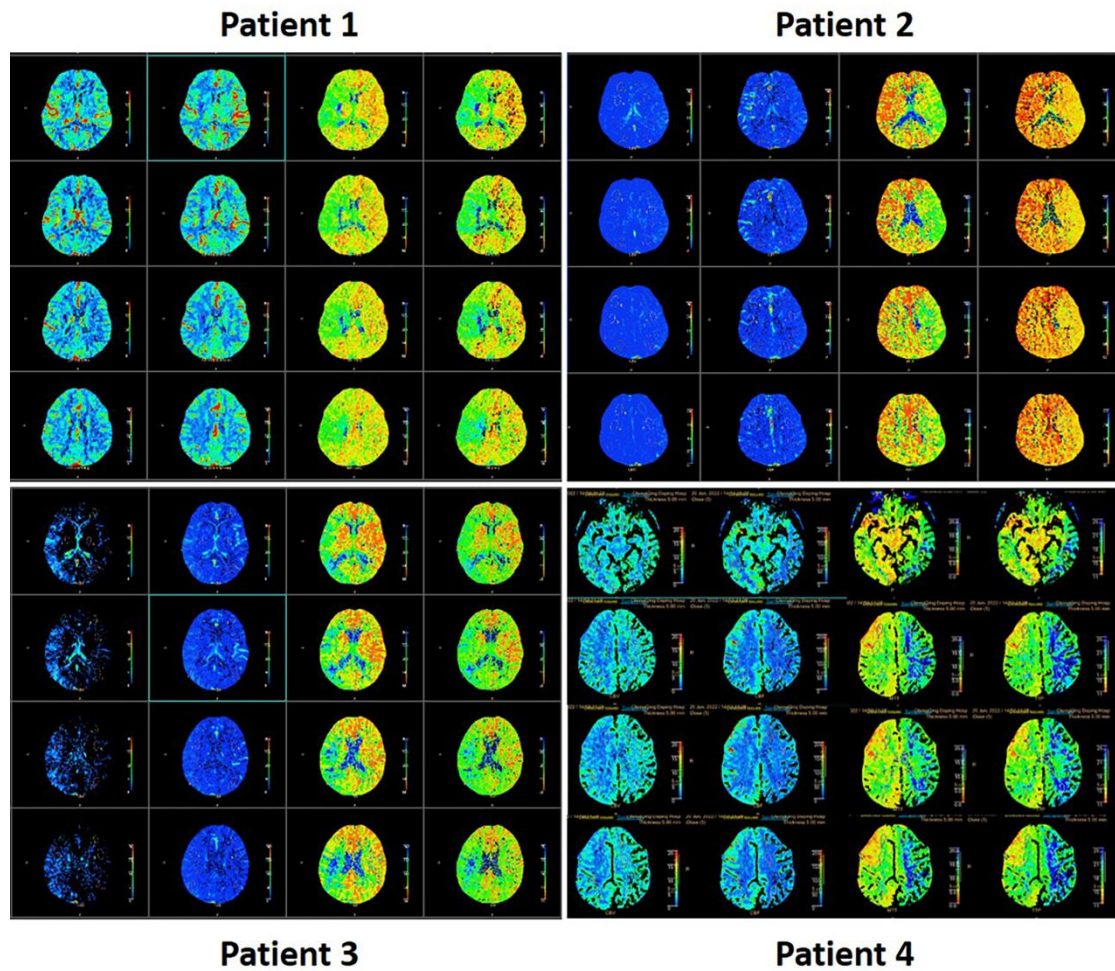

**Supplementary figure 1 The CTP of patients 1-4. A-D** The CTP figures of four MCA occlusion patients (including two RMCA occlusion and two LMCA occlusion). Red arrows point the occlusion MCA.

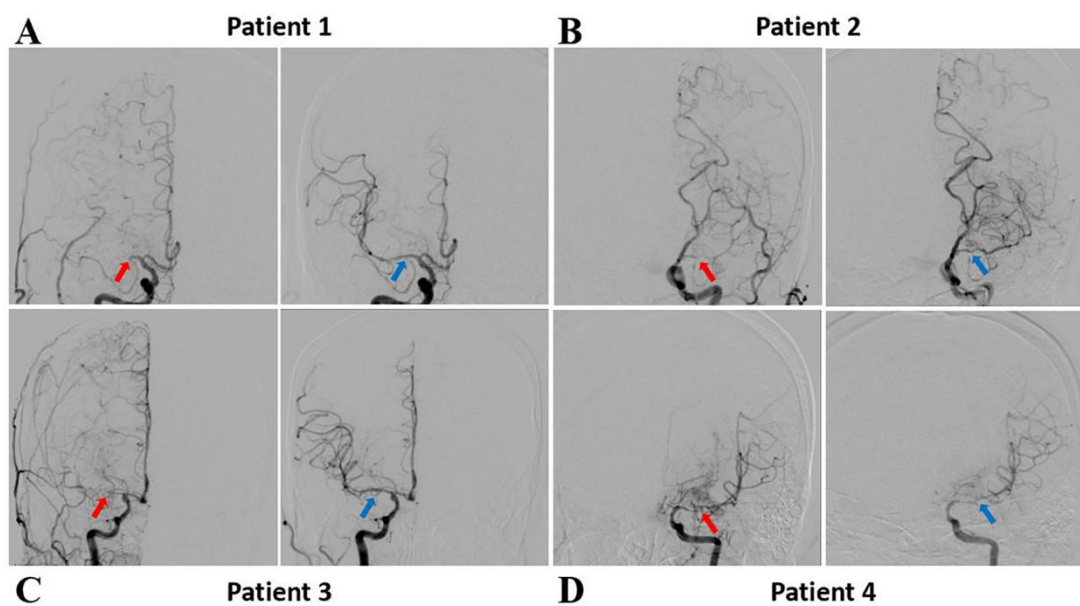

**Supplementary figure 2 The DSA before and after the EVT of patients 1-4. A-D** The comparison of these four MCA occlusion patients before and after EVT. Red arrows point the occlusion MCA before EVT, blue arrows point the occlusion MCA after EVT. DSA Digital subtraction angiography, EVT Endovascular treatment.

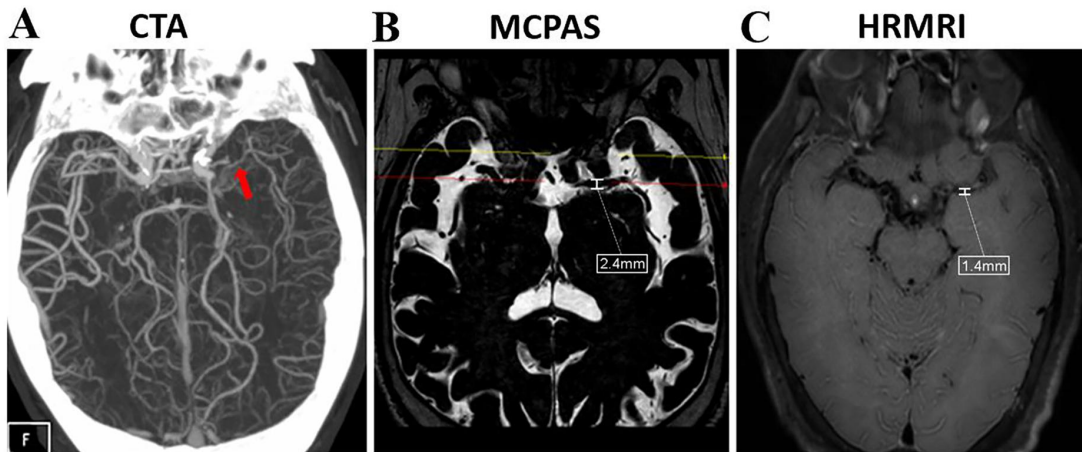

**Supplementary figure 3 The image data of CTA, MCPAS and HRMRI of patient 2.**

(A) CTA shows that the patient's LMCA is completely occluded. (B) MCPAS shows the morphology of the patient's LMCA, with a measured vessel luminal diameter of 2.4mm. Red arrows point the occlusion MCA. (C) HRMRI shows the morphology of the patient's LMCA, with a measured vessel luminal diameter of 1.4mm.

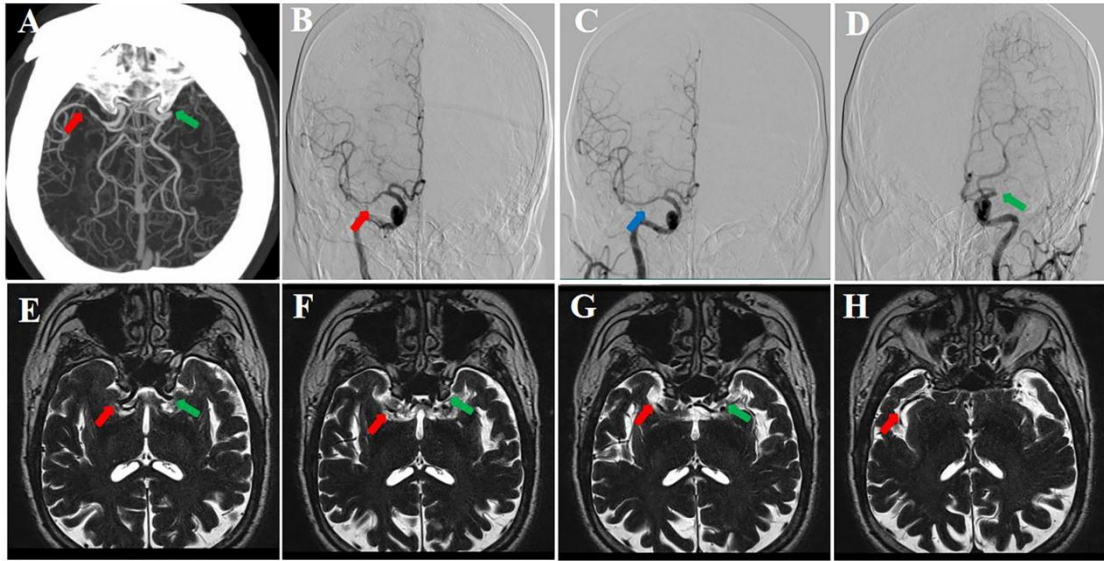

**Supplementary figure 4 The CTA, MAPAS and DSA of patients 5 manifested as RMCA stenosis and LMCA occlusion.** (A) CTA displays the patient's the LMCA was occluded, with severe stenosis in the RMCA. (B, C) The DSA displays the MCA before EVT. (D) The DSA displays the RMCA after EVT. (E-H) Multiple MCPAS images show the morphology of bilateral MCA in the patient. Red arrows point the occlusion RMCA before EVT, blue arrows point the occlusion RMCA after EVT, green arrows point the occlusion LMCA.

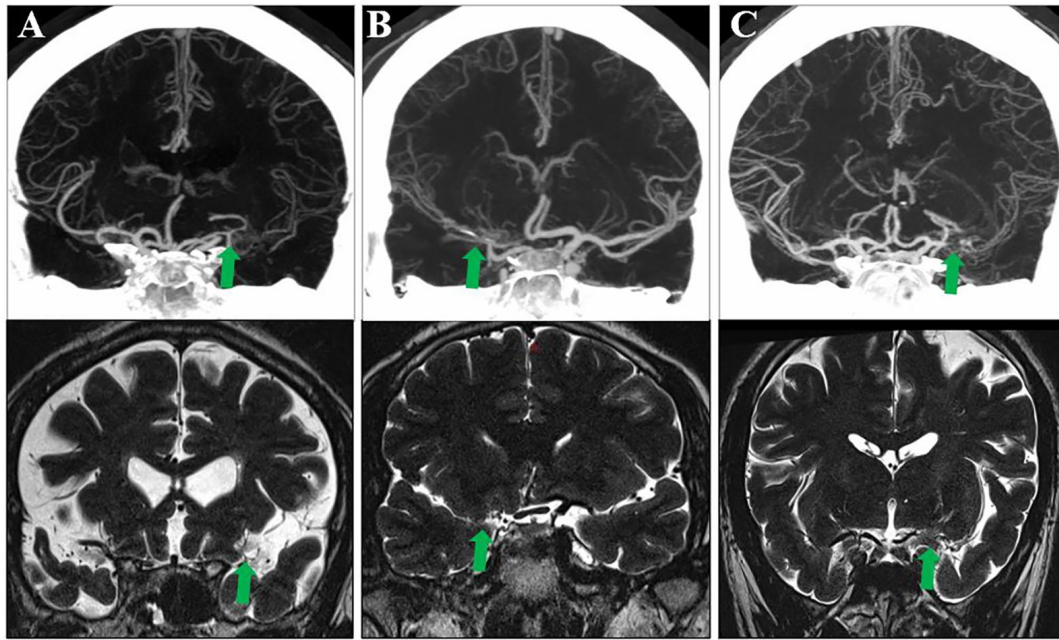

**Supplementary figure 5** The examples of MCPAS excluding patients from EVT.

(A-C) These three patients' occluded MCA did not show contrast in either CTA or MCPAS. Therefore, EVT treatment was not performed on these three patients.
